# Supplementary material
Source: Springer Nature journal article supplement (https://www.springermedizin.de/resource/supplementary/12919_2011_40_MOESM1_ESM.pdf/9654334)
Supplement: MOESM1 [file 9654334]

**Additional file 1 — Coverage of samples**

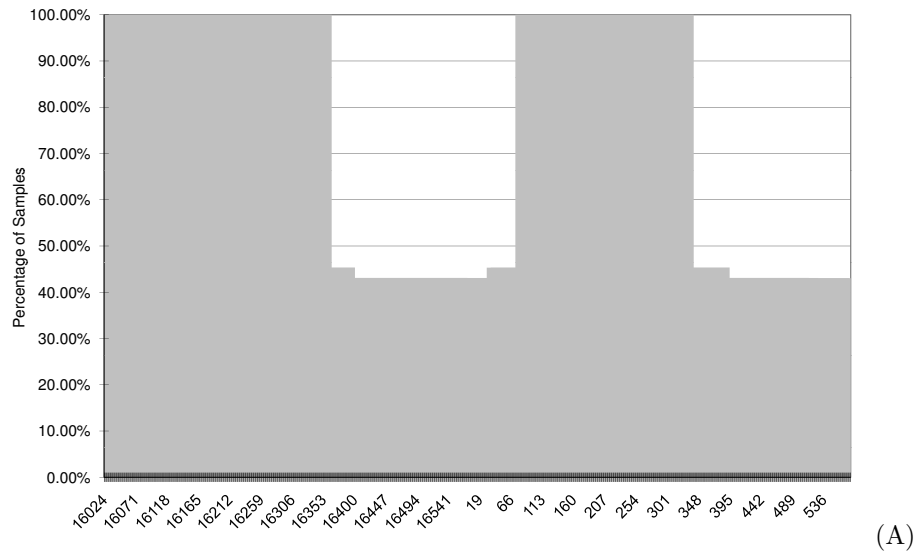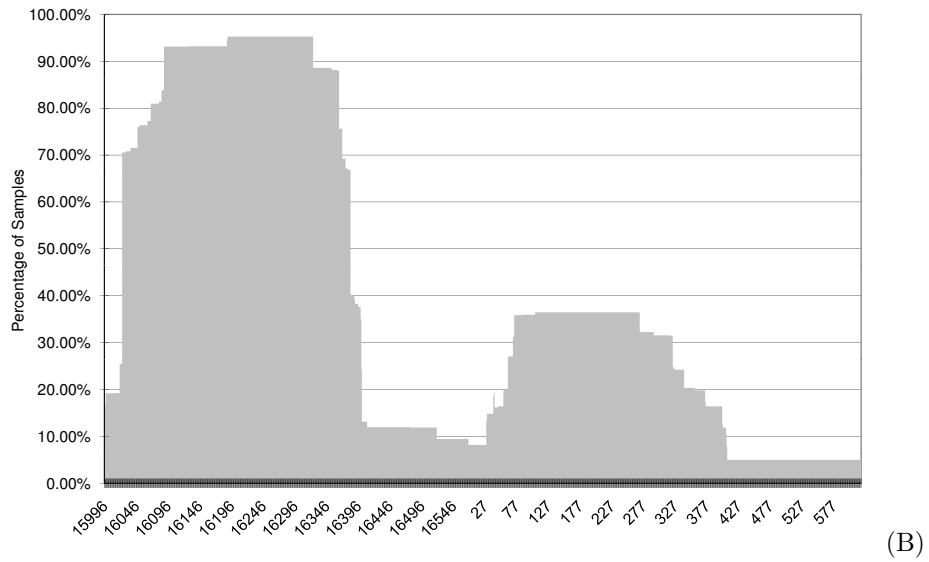

Percentage of samples covering each position of HVR1 and HVR2 in the forensic (A) and published (B) datasets.
